# Supplementary material for: Controllable Drug Delivery by Na+/K+ ATPase α1 Targeting Peptide Conjugated DSPE-PEG Nanocarriers for Breast Cancer
Source: PubMed Central journal article supplement — Technol Cancer Res Treat. 2021 Jun 28;20:15330338211027898. doi: 10.1177/15330338211027898 (PMC8243088; doi:10.1177/15330338211027898), 2021-06-28
Supplement: sj-pdf-1-tct-10.1177_15330338211027898.pdf [file sj-pdf-1-tct-10.1177_15330338211027898.pdf]

# Controllable Drug Delivery by Na<sup>+</sup>/K<sup>+</sup> ATPase $\alpha$ 1 Targeting Peptide Conjugated DSPE-PEG Nanocarriers for Breast Cancer

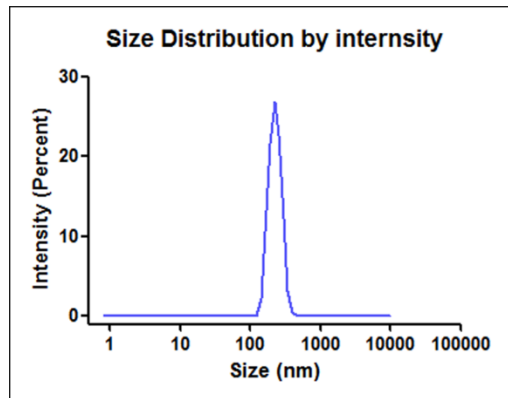

Figure S1. Size distribution of DP-EPI-TP.

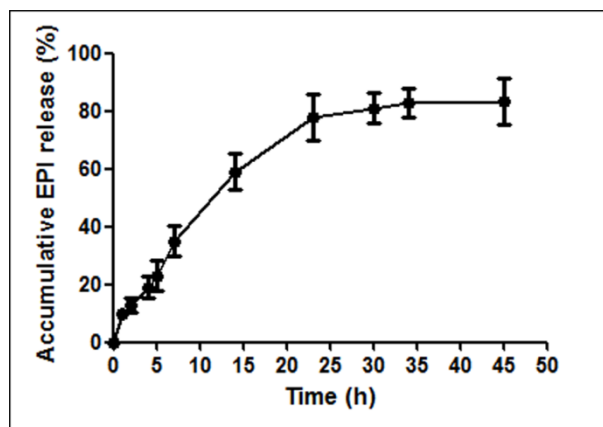

Figure S2. *In vitro* EPI release from DP-EPI-TP. The released EPI was measured by RP-HPLC after dialysis (MWCO 2,000 Da) against 1M sodium salicylate at 37°C.

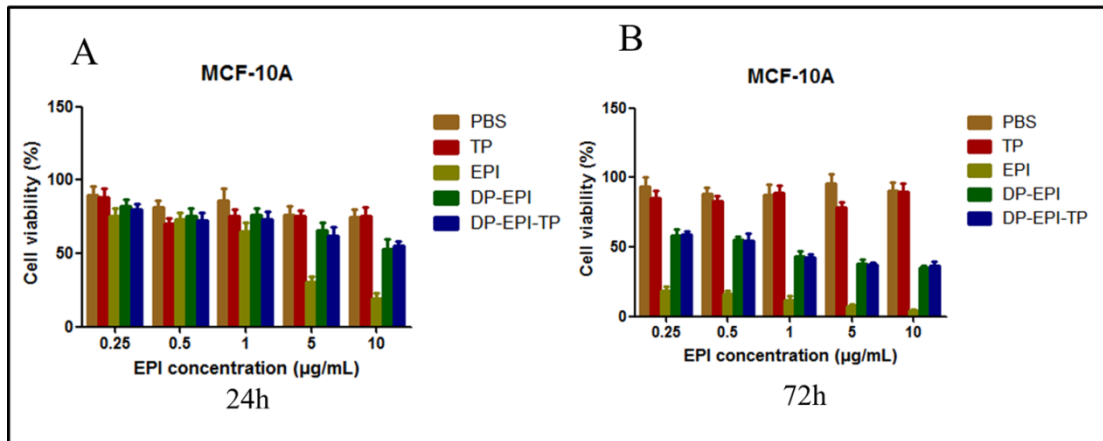

Figure S3. Viability of MCF-10A cells in response to the different treatments. Cells were treated with the different groups incubated for 24 (A) and 72 h (B) before counting by CCK-8 assay.
